# Supplementary material for: Assembly of cyclic ferrocene-sensitized titanium-oxo clusters with excellent photoelectrochemical activity
Source: Royal Society of Chemistry journal article supplement (doi:10.1039/d2qi01007k), 2022-01-01
Supplement: d2qi01007k1.pdf [file d2qi01007k1.pdf]

## Supporting Information

### **Assembly of Cyclic Ferrocene-Sensitized Titanium-Oxo Clusters with Excellent Photoelectrochemical Activity**

Chao Wang,<sup>\*a</sup> Ning Chen,<sup>a</sup> Shou Juan Wang<sup>a</sup> and Fan Gong Kong<sup>a</sup>

State Key Laboratory of Biobased Material and Green Papermaking, Qilu University of  
Technology (Shandong Academy of Sciences), No. 3501 University Road, Jinan, 250353,  
China, E-mail: wangchao@qlu.edu.cn.

## 1. Experimental details

**Materials, Syntheses and Characterization.** All reagents were purchased commercially and not further purified when used.  $\text{Ti}(\text{O}^i\text{Pr})_4$ , 1,1'-ferrocenedicarboxylic acid, dichloromethane, *n*-propanol, isonicotinic acid, and salicylichydroxamic acid were purchased from Aladdin Ltd. Powder X-ray diffraction (PXRD) data were obtained on a Rigaku SmartLab diffractometer. The diffuse-reflectance spectra for the cluster samples were obtained on a UV-4000 spectrophotometer. X-ray photoelectron spectroscopy (XPS) analysis was carried out on an ESCALAB Xi+ XPS system with Al  $K\alpha$  X-ray radiation. Infrared spectra were recorded on an ALPHA II FT-IR spectrophotometer in the range of 400–4000  $\text{cm}^{-1}$ . Thermogravimetric analysis (TGA) patterns were recorded on a TGAQ50 instrument in a  $\text{N}_2$  atmosphere.

**Photoelectrochemical measurements.** All electrochemical measurements were carried out with a CHI660e electrochemical workstation via a conventional three-electrode system in a  $\text{Na}_2\text{SO}_4$  (0.2 M) aqueous solution. The working electrode was indium-tin oxide (ITO) glass plates coated with a cluster-slurry, the counter electrode was a platinum foil, and the reference electrode was a saturated Ag/AgCl electrode. The Mott-Schottky plots were measured over an alternating current frequency of 1000 Hz. Electrochemical impedance spectra measurements were recorded over a frequency range of 100 kHz–0.1 Hz with alternating current amplitude of 10 mV at 0 V. A 300 W high-pressure xenon lamp with UV cut-off filter was used as a light source. Preparation of the working electrode: 5 mg cluster were dispersed in a solution of ethanol (1 mL) to generate homogeneous slurry. Subsequently, 200  $\mu\text{L}$  of slurry was transferred and coated on ITO glass plates (1  $\text{cm}^2$ ) then dried at room temperature.

**Single-crystal structure determinations.** Crystallographic data were collected on a Rigaku XtaLAB Synergy X-ray single crystal diffractometer. The CCDC numbers of clusters **1** and **2** are 2164045 and 2164046, and the specific crystallographic information can be received from the Cambridge Crystallographic Data Centre. The structures are solved by the inherent phase method in the SHELXT program, and refined by the least square method in the SHELXL<sup>1</sup> program. Both programs are used coupling with OLEX2<sup>2</sup>. Crystallographic data for clusters **1** and **2** are summarized in Table S1 and S2.

**Computational Details.** All calculations were done using the *Gaussian* 09 program.<sup>3</sup> Geometry optimization calculations for these two clusters were performed by using the B3LYP DFT method on the basis of the crystal structures. The basis set used for the C, H, O and N atoms was 6-31G\*, and the LANL2DZ pseudopotential basis set was employed for Ti and Fe atoms. Also, in order to save time, the terminal isopropyl groups of two clusters were replaced by methyl groups to simplify the complexity of the calculation.

## 2. Crystallographic details

Table S1. X-ray measurements and structure solution of clusters **1** and **2**.

| Compound                                                | <b>1</b>                                                                                                                  | <b>2</b>                                                                                                                               |
|---------------------------------------------------------|---------------------------------------------------------------------------------------------------------------------------|----------------------------------------------------------------------------------------------------------------------------------------|
| Empirical formula                                       | C <sub>144</sub> H <sub>254</sub> Fe <sub>4</sub> O <sub>52</sub> Ti <sub>12</sub> ·0.5(CH <sub>2</sub> Cl <sub>2</sub> ) | C <sub>166</sub> H <sub>278</sub> Fe <sub>2</sub> N <sub>6</sub> O <sub>68</sub> Ti <sub>18</sub> ·2(C <sub>3</sub> H <sub>7</sub> OH) |
| Formula weight                                          | 3658.12                                                                                                                   | 4540.01                                                                                                                                |
| Crystal system                                          | Orthorhombic                                                                                                              | Triclinic                                                                                                                              |
| Space group                                             | Pbcn                                                                                                                      | P-1                                                                                                                                    |
| a/Å                                                     | 18.8704(10)                                                                                                               | 12.8214(4)                                                                                                                             |
| b/Å                                                     | 25.6001(12)                                                                                                               | 20.1358(6)                                                                                                                             |
| c/Å                                                     | 37.8336(19)                                                                                                               | 21.7220(5)                                                                                                                             |
| α/°                                                     | 90                                                                                                                        | 95.208(2)                                                                                                                              |
| β/°                                                     | 90                                                                                                                        | 96.328(2)                                                                                                                              |
| γ/°                                                     | 90                                                                                                                        | 96.811(2)                                                                                                                              |
| V                                                       | 18276.8(16)                                                                                                               | 5503.7(3)                                                                                                                              |
| Z                                                       | 4                                                                                                                         | 1                                                                                                                                      |
| ρ <sub>calc</sub> /g·cm <sup>-3</sup>                   | 1.330                                                                                                                     | 1.370                                                                                                                                  |
| μ(MoKα)/mm <sup>-1</sup>                                | 0.365                                                                                                                     | 6.908                                                                                                                                  |
| F(000)                                                  | 7700.0                                                                                                                    | 2376.0                                                                                                                                 |
| Reflections collected/unique                            | 92809/16735                                                                                                               | 56252/19247                                                                                                                            |
| Data/restraints/parameters                              | 16735/240/1104                                                                                                            | 19247/108/1235                                                                                                                         |
| R <sub>1</sub> /wR <sub>2</sub> (I>2σ(I)) <sup>a</sup>  | 0.0857/0.2396                                                                                                             | 0.0585/0.1464                                                                                                                          |
| R <sub>1</sub> /wR <sub>2</sub> (all data) <sup>a</sup> | 0.1027/0.2528                                                                                                             | 0.0904/0.1620                                                                                                                          |
| Goof (all data) <sup>b</sup>                            | 1.035                                                                                                                     | 1.048                                                                                                                                  |

$$^a R_1 = \frac{\sum |F_o| - |F_c|}{\sum |F_o|}; wR_2 = \left\{ \frac{\sum w[(F_o)^2 - (F_c)^2]^2}{\sum w(F_o)^2} \right\}^{1/2}$$

$$^b \text{Goof} = \left\{ \frac{\sum w[(F_o)^2 - (F_c)^2]}{(n-p)} \right\}^{1/2}$$

Table S2. Some main bond length and bond angle information.

| Some bond length information of <b>Ti<sub>17</sub>Fdc<sub>4</sub></b> |           |          |       |          |            |                      |       |           |       |
|-----------------------------------------------------------------------|-----------|----------|-------|----------|------------|----------------------|-------|-----------|-------|
| Ti1—O1                                                                | 2.007 (4) | Ti5—O25  | 1.815 | O24—C48  | 1.250 (7)  | C31—C35              | 1.400 | C64A—C65A | 1.464 |
| Ti1—O2                                                                | 1.800 (4) | Ti6—O18  | 1.984 | O25—C70  | 1.28 (2)   | C32—C33              | 1.431 | C64A—C66A | 1.505 |
| Ti1—O3                                                                | 1.815 (5) | Ti6—O20  | 1.838 | O25—C70A | 1.550 (18) | C33—C34              | 1.423 | C67—C68   | 1.44  |
| Ti1—O8                                                                | 1.984 (4) | Ti6—O22  | 1.789 | O26—C64  | 1.60 (4)   | C33—C48 <sup>i</sup> | 1.485 | C67—C69   | 1.55  |
| Ti1—O9                                                                | 2.053 (4) | Ti6—O23  | 2.050 | O26—C64A | 1.367 (15) | C34—C35              | 1.404 | C67A—C68A | 1.51  |
| Ti1—O13                                                               | 2.137 (4) | Ti6—O26  | 1.761 | C1—C2    | 1.452 (13) | C36—C37              | 1.493 | C67A—C69A | 1.56  |
| Ti2—O1                                                                | 2.012 (4) | O1—C1    | 1.439 | C1—C3    | 1.423 (11) | C37—C38              | 1.405 | C70—C71   | 1.63  |
| Ti2—O4                                                                | 1.817 (4) | O2—C4    | 1.466 | C4—C5    | 1.463 (18) | C37—C41              | 1.437 | C70—C72   | 1.441 |
| Ti2—O5                                                                | 1.788 (4) | O3—C7    | 1.404 | C4—C6    | 1.358 (18) | C38—C39              | 1.408 | Fe1—C26   | 2.043 |
| Ti2—O6                                                                | 2.143 (4) | O4—C10   | 1.423 | C7—C8    | 1.471 (15) | C39—C40              | 1.385 | Fe1—C27   | 2.025 |
| Ti2—O7                                                                | 2.025 (4) | O5—C13   | 1.405 | C7—C9    | 1.488 (13) | C40—C41              | 1.415 | Fe1—C28   | 2.035 |
| Ti2—O8                                                                | 2.004 (4) | O6—C25   | 1.277 | C10—C11  | 1.503 (11) | C42—C43              | 1.454 | Fe1—C29   | 2.039 |
| Ti3—O7                                                                | 1.991 (4) | O7—C16   | 1.472 | C10—C12  | 1.518 (11) | C43—C44              | 1.411 | Fe1—C30   | 2.028 |
| Ti3—O8                                                                | 1.853 (4) | O9—C36   | 1.240 | C13—C14  | 1.459 (12) | C43—C47              | 1.458 | Fe1—C31   | 2.038 |
| Ti3—O10                                                               | 2.053 (4) | O10—C36  | 1.260 | C13—C15  | 1.378 (13) | C44—C45              | 1.419 | Fe1—C32   | 2.051 |
| Ti3—O11                                                               | 1.771 (5) | O11—C19  | 1.369 | C16—C17  | 1.491 (12) | C45—C46              | 1.417 | Fe1—C33   | 2.044 |
| Ti3—O12                                                               | 1.789 (5) | O12—C22  | 1.399 | C16—C18  | 1.467 (13) | C49—C50              | 1.484 | Fe1—C34   | 2.030 |
| Ti4—O14                                                               | 1.819 (6) | O13—C25  | 1.256 | C19—C20  | 1.462 (17) | C49—C51              | 1.514 | Fe1—C35   | 2.022 |
| Ti4—O15                                                               | 1.795 (5) | O14—C67  | 1.50  | C19—C21  | 1.413 (15) | C52—C53              | 1.496 | Fe2—C37   | 2.026 |
| Ti4—O16                                                               | 2.016 (5) | O14—C67A | 1.366 | C22—C23  | 1.514 (13) | C52—C54              | 1.485 | Fe2—C38   | 2.039 |
| Ti4—O17                                                               | 2.141 (5) | O15—C49  | 1.405 | C22—C24  | 1.426 (13) | C55—C56              | 1.516 | Fe2—C39   | 2.038 |
| Ti4—O18                                                               | 2.040 (4) | O16—C52  | 1.453 | C25—C26  | 1.468 (8)  | C55—C57              | 1.411 | Fe2—C40   | 2.032 |
| Ti4—O20                                                               | 2.018 (4) | O17—C42  | 1.277 | C26—C27  | 1.423 (8)  | C58—C59              | 1.450 | Fe2—C41   | 2.032 |
| Ti5—O16                                                               | 2.010 (5) | O18—C55  | 1.432 | C26—C30  | 1.453 (9)  | C58—C60              | 1.483 | Fe2—C43   | 2.035 |
| Ti5—O19                                                               | 1.815 (5) | O19—C61  | 1.434 | C27—C28  | 1.402 (10) | C61—C62              | 1.508 | Fe2—C44   | 2.036 |
| Ti5—O20                                                               | 1.996 (4) | O21—C42  | 1.271 | C28—C29  | 1.418 (10) | C61—C63              | 1.409 | Fe2—C45   | 2.043 |
| Ti5—O21                                                               | 2.109 (6) | O22—C58  | 1.406 | C29—C30  | 1.419 (9)  | C64—C65              | 1.470 | Fe2—C46   | 2.046 |
| Ti5—O24                                                               | 2.045 (4) | O23—C48  | 1.263 | C31—C32  | 1.404 (10) | C64—C66              | 1.513 | Fe2—C47   | 2.031 |
| Some bond length information of <b>Ti<sub>18</sub>Fdc<sub>2</sub></b> |           |          |       |          |            |                      |       |           |       |
| Ti1—O2                                                                | 1.798 (3) | Ti7—O7   | 2.204 | O23—C32  | 1.253 (5)  | C19—C45              | 1.494 | C56—C64   | 1.472 |
| Ti1—O9                                                                | 1.966 (3) | Ti7—O21  | 1.777 | O24—C64  | 1.270 (5)  | C20—C67              | 1.472 | C57—C59   | 1.386 |
| Ti1—O15                                                               | 2.004 (3) | Ti7—O22  | 2.031 | O26—C12  | 1.454 (6)  | C21—C48              | 1.377 | C59—C63   | 1.401 |
| Ti1—O16                                                               | 2.049 (3) | Ti7—O26  | 2.058 | O27—C71  | 1.447 (6)  | C22—C70              | 1.511 | C67—C78   | 1.466 |
| Ti1—O23                                                               | 2.154 (3) | Ti7—O31  | 1.878 | O28—C38  | 1.392 (7)  | C23—C47              | 1.414 | C71—C73   | 1.443 |
| Ti1—O33                                                               | 1.806 (3) | Ti8—O14  | 1.881 | O29—C52  | 1.411 (7)  | C23—C56              | 1.426 | C81—C82   | 1.422 |
| Ti2—O8                                                                | 1.757 (4) | Ti8—O25  | 1.819 | O30—C30  | 1.432 (8)  | C24—C25              | 1.421 | C81A—C82A | 1.514 |
| Ti2—O9                                                                | 1.871 (3) | Ti8—O30  | 1.774 | O32—C45  | 1.457 (5)  | C24—C29              | 1.421 | C82—C83   | 1.414 |
| Ti2—O12                                                               | 1.778 (3) | Ti8—O31  | 1.932 | O33—C33  | 1.423 (6)  | C25—C41              | 1.415 | C82A—C83A | 1.452 |
| Ti2—O13                                                               | 1.990 (3) | Ti8—N3   | 2.134 | O34—C16  | 1.262 (5)  | C26—C55              | 1.482 | Fe1—C23   | 2.032 |
| Ti2—O34                                                               | 2.059 (3) | Ti9—O4   | 1.773 | N1—C48   | 1.342 (5)  | C27—C37              | 1.416 | Fe1—C24   | 2.020 |
| Ti3—O9                                                                | 2.016 (3) | Ti9—O6   | 1.867 | N1—C80   | 1.346 (5)  | C27—C56              | 1.418 | Fe1—C25   | 2.043 |
| Ti3—O13                                                               | 2.013 (4) | Ti9—O10  | 1.983 | N2—C72   | 1.302 (6)  | C28—C51              | 1.494 | Fe1—C27   | 2.050 |
| Ti3—O15                                                               | 2.039 (4) | Ti9—O22  | 2.008 | N3—C31   | 1.351 (6)  | C29—C35              | 1.399 | Fe1—C29   | 2.020 |
| Ti3—O19                                                               | 2.180 (3) | Ti9—O26  | 2.029 | C1—C21   | 1.390 (6)  | C30—C68              | 1.391 | Fe1—C35   | 2.061 |
| Ti3—O28                                                               | 1.779 (3) | Ti9—N2   | 2.172 | C1—C32   | 1.491 (6)  | C30—C76              | 1.529 | Fe1—C37   | 2.052 |
| Ti3—O29                                                               | 1.801 (3) | O2—C51   | 1.426 | C1—C40   | 1.381 (6)  | C31—C57              | 1.442 | Fe1—C41   | 2.063 |

|                                                                                  |           |              |             |             |            |             |       |         |       |
|----------------------------------------------------------------------------------|-----------|--------------|-------------|-------------|------------|-------------|-------|---------|-------|
| Ti4—O1                                                                           | 1.986 (3) | O3—C64       | 1.264       | C2—C36      | 1.482 (12) | C33—C69     | 1.487 | Fe1—C47 | 2.041 |
| Ti4—O5                                                                           | 1.775 (3) | O4—C2        | 1.419       | C2—C74      | 1.499 (12) | C34—C52     | 1.496 | Fe1—C56 | 2.039 |
| Ti4—O17                                                                          | 1.803 (3) | O6—C49       | 1.348       | C3—C33      | 1.507 (8)  | C35—C41     | 1.402 |         |       |
| Ti4—O24                                                                          | 2.043 (3) | O7—N2        | 1.400       | C4—C52      | 1.475 (10) | C37—C47     | 1.426 |         |       |
| Ti4—O32                                                                          | 1.994 (3) | O8—C82       | 1.410       | C5—C6       | 1.378 (8)  | C38—C62     | 1.396 |         |       |
| Ti4—N1 <sup>i</sup>                                                              | 2.322 (3) | O8—C82A      | 1.43        | C5—C57      | 1.414 (7)  | C39—C43     | 1.376 |         |       |
| Ti5—O1                                                                           | 1.965 (3) | O10—C31      | 1.292       | C6—C42      | 1.368 (9)  | C39—C49     | 1.393 |         |       |
| Ti5—O3                                                                           | 2.052 (3) | O11—C72      | 1.307       | C7—C55      | 1.504 (9)  | C39—C72     | 1.465 |         |       |
| Ti5—O20                                                                          | 1.786 (3) | O12—C61      | 1.424       | C8—C13      | 1.414 (10) | C40—C80     | 1.375 |         |       |
| Ti5—O25                                                                          | 1.855 (3) | O13—C22      | 1.461       | C9—C75      | 1.443 (10) | C42—C63     | 1.367 |         |       |
| Ti5—O27                                                                          | 2.033 (3) | O14—C59      | 1.334       | C10—C38     | 1.399 (12) | C43—C77     | 1.382 |         |       |
| Ti5—O31                                                                          | 2.139 (3) | O15—C75      | 1.449       | C11—C13     | 1.454 (9)  | C44—C61     | 1.492 |         |       |
| Ti6—O1                                                                           | 1.890 (3) | O16—C16      | 1.248       | C12—C58     | 1.497 (10) | C45—C53     | 1.522 |         |       |
| Ti6—O7                                                                           | 2.020 (3) | O17—C13      | 1.388       | C12—C66     | 1.472 (11) | C46—C65     | 1.367 |         |       |
| Ti6—O11                                                                          | 1.993 (3) | O18—C67      | 1.418       | C14—C61     | 1.485 (10) | C46—C77     | 1.352 |         |       |
| Ti6—O18                                                                          | 1.803 (3) | O19—C32      | 1.255       | C15—C22     | 1.531 (10) | C49—C65     | 1.412 |         |       |
| Ti6—O27                                                                          | 1.993 (3) | O20—C55      | 1.387       | C16—C24     | 1.472 (6)  | C50—C75     | 1.510 |         |       |
| Ti6—O32                                                                          | 2.052 (3) | O21—C54      | 1.426       | C17—C54     | 1.514 (9)  | C51—C79     | 1.483 |         |       |
| Ti7—O5                                                                           | 1.848 (3) | O22—N3       | 1.379       | C18—C71     | 1.449 (9)  | C54—C60     | 1.481 |         |       |
| Some bond angle information of <b>Ti<sub>7</sub>Fe<sub>6</sub>C<sub>84</sub></b> |           |              |             |             |            |             |       |         |       |
| O1—Ti1—O9                                                                        | 162.19    | C13—O5—Ti2   | 163.5 (5)   | C31—C35—C34 | 110.2      | C27—Fe1—C34 | 107.7 |         |       |
| O1—Ti1—O13                                                                       | 87.75     | C25—O6—Ti2   | 129.9 (4)   | C34—C35—Fe1 | 70.0 (4)   | C28—Fe1—C26 | 68.5  |         |       |
| O2—Ti1—O1                                                                        | 101.1 (2) | Ti3—O7—Ti2   | 100.13 (16) | O9—C36—O10  | 126.3      | C28—Fe1—C29 | 40.7  |         |       |
| O2—Ti1—O3                                                                        | 97.4 (2)  | C16—O7—Ti2   | 128.5 (4)   | O9—C36—C37  | 118.6      | C28—Fe1—C31 | 157.8 |         |       |
| O2—Ti1—O8                                                                        | 167.6 (2) | C16—O7—Ti3   | 129.8 (4)   | O10—C36—C37 | 115.2      | C28—Fe1—C32 | 123.2 |         |       |
| O2—Ti1—O9                                                                        | 94.5 (2)  | Ti1—O8—Ti2   | 103.62 (19) | C36—C37—Fe2 | 124.0      | C28—Fe1—C33 | 108.5 |         |       |
| O2—Ti1—O13                                                                       | 85.0 (2)  | Ti3—O8—Ti1   | 141.9 (2)   | C38—C37—Fe2 | 70.3 (3)   | C29—Fe1—C26 | 69.0  |         |       |
| O3—Ti1—O1                                                                        | 93.94     | Ti3—O8—Ti2   | 105.89 (18) | C38—C37—C36 | 127.3      | C29—Fe1—C32 | 107.5 |         |       |
| O3—Ti1—O8                                                                        | 94.86     | C36—O9—Ti1   | 136.2 (4)   | C38—C37—C41 | 108.5      | C29—Fe1—C33 | 123.8 |         |       |
| O3—Ti1—O9                                                                        | 92.4 (2)  | C36—O10—Ti3  | 136.3 (4)   | C41—C37—Fe2 | 69.5 (3)   | C30—Fe1—C26 | 41.8  |         |       |
| O3—Ti1—O13                                                                       | 176.7 (2) | C19—O11—Ti3  | 157.8 (7)   | C41—C37—C36 | 124.2      | C30—Fe1—C28 | 68.9  |         |       |
| O8—Ti1—O1                                                                        | 76.60     | C22—O12—Ti3  | 140.3 (6)   | C37—C38—Fe2 | 69.3 (3)   | C30—Fe1—C29 | 40.8  |         |       |
| O8—Ti1—O9                                                                        | 86.32     | C25—O13—Ti1  | 128.8 (4)   | C37—C38—C39 | 107.6      | C30—Fe1—C31 | 105.6 |         |       |
| O8—Ti1—O13                                                                       | 82.74     | C67—O14—Ti4  | 135.2 (12)  | C39—C38—Fe2 | 69.7 (4)   | C30—Fe1—C32 | 121.9 |         |       |
| O9—Ti1—O13                                                                       | 85.11     | C67A—O14—Ti4 | 142.6 (11)  | C38—C39—Fe2 | 69.8 (4)   | C30—Fe1—C33 | 159.1 |         |       |
| O1—Ti2—O6                                                                        | 83.66     | C49—O15—Ti4  | 149.5 (5)   | C40—C39—Fe2 | 69.9 (4)   | C30—Fe1—C34 | 157.6 |         |       |
| O1—Ti2—O7                                                                        | 148.68    | Ti5—O16—Ti4  | 102.40 (19) | C40—C39—C38 | 108.6      | C31—Fe1—C26 | 122.7 |         |       |
| O4—Ti2—O1                                                                        | 98.53     | C52—O16—Ti4  | 123.7 (4)   | C39—C40—Fe2 | 70.3 (4)   | C31—Fe1—C29 | 121.3 |         |       |
| O4—Ti2—O6                                                                        | 177.5 (2) | C52—O16—Ti5  | 129.9 (5)   | C39—C40—C41 | 109.5      | C31—Fe1—C32 | 40.1  |         |       |
| O4—Ti2—O7                                                                        | 94.87     | C42—O17—Ti4  | 130.5 (5)   | C41—C40—Fe2 | 69.6 (4)   | C31—Fe1—C33 | 68.5  |         |       |
| O4—Ti2—O8                                                                        | 94.75     | Ti6—O18—Ti4  | 100.20 (18) | C37—C41—Fe2 | 69.0 (3)   | C33—Fe1—C32 | 40.9  |         |       |
| O5—Ti2—O1                                                                        | 105.1 (2) | C55—O18—Ti4  | 125.6 (5)   | C40—C41—Fe2 | 69.6 (4)   | C34—Fe1—C26 | 121.6 |         |       |
| O5—Ti2—O4                                                                        | 95.76     | C55—O18—Ti6  | 133.6 (5)   | C40—C41—C37 | 105.8      | C34—Fe1—C28 | 124.3 |         |       |
| O5—Ti2—O6                                                                        | 84.84     | C61—O19—Ti5  | 141.8 (6)   | O21—C42—C43 | 117.9      | C34—Fe1—C29 | 160.6 |         |       |
| O5—Ti2—O7                                                                        | 101.5 (2) | Ti5—O20—Ti4  | 102.84 (18) | C42—C43—Fe2 | 122.8      | C34—Fe1—C31 | 68.8  |         |       |
| O5—Ti2—O8                                                                        | 169.12    | Ti6—O20—Ti4  | 106.3 (2)   | C42—C43—C47 | 127.4      | C34—Fe1—C32 | 68.6  |         |       |
| O7—Ti2—O6                                                                        | 82.60     | Ti6—O20—Ti5  | 142.8 (2)   | C44—C43—Fe2 | 69.8 (4)   | C34—Fe1—C33 | 40.9  |         |       |
| O8—Ti2—O1                                                                        | 76.04     | C42—O21—Ti5  | 128.1 (5)   | C44—C43—C42 | 126.2      | C35—Fe1—C26 | 107.5 |         |       |
| O8—Ti2—O6                                                                        | 84.54     | C58—O22—Ti6  | 142.4 (6)   | C44—C43—C47 | 106.3      | C35—Fe1—C27 | 124.3 |         |       |

|             |           |              |            |                          |          |             |       |
|-------------|-----------|--------------|------------|--------------------------|----------|-------------|-------|
| O8—Ti2—O7   | 74.74     | C48—O23—Ti6  | 135.6 (4)  | C47—C43—Fe2              | 68.9 (4) | C35—Fe1—C28 | 160.8 |
| O7—Ti3—O10  | 164.89    | C48—O24—Ti5  | 136.9 (4)  | C43—C44—Fe2              | 69.7 (4) | C35—Fe1—C29 | 157.2 |
| O8—Ti3—O7   | 78.93     | C70—O25—Ti5  | 142.5 (11) | C43—C44—C45              | 108.2    | C35—Fe1—C30 | 121.4 |
| O8—Ti3—O10  | 86.69     | C70A—O25—Ti5 | 155.2 (14) | C45—C44—Fe2              | 69.9 (4) | C35—Fe1—C31 | 40.3  |
| O11—Ti3—O7  | 100.1 (2) | C64—O26—Ti6  | 147.0 (14) | C44—C45—Fe2              | 69.4 (4) | C35—Fe1—C32 | 67.3  |
| O11—Ti3—O8  | 121.0 (2) | C64A—O26—Ti6 | 160.1 (8)  | C46—C45—Fe2              | 69.8 (4) | C35—Fe1—C33 | 67.8  |
| O11—Ti3—O10 | 91.2 (2)  | O1—C1—C2     | 109.2 (7)  | C46—C45—C44              | 108.3    | C35—Fe1—C34 | 40.5  |
| O11—Ti3—O12 | 114.4 (3) | C3—C1—O1     | 115.2 (7)  | C45—C46—Fe2              | 69.6 (4) | C37—Fe2—C38 | 40.4  |
| O12—Ti3—O7  | 96.0 (2)  | C3—C1—C2     | 113.6 (9)  | C47—C46—Fe2              | 69.7 (4) | C37—Fe2—C39 | 67.9  |
| O12—Ti3—O8  | 124.5 (2) | O3—C7—C8     | 108.9 (10) | C47—C46—C45              | 108.3    | C37—Fe2—C40 | 68.2  |
| O12—Ti3—O10 | 88.27     | O3—C7—C9     | 110.2 (8)  | C43—C47—Fe2              | 69.1 (4) | C37—Fe2—C41 | 41.5  |
| O14—Ti4—O16 | 96.7 (2)  | C8—C7—C9     | 114.5 (10) | C46—C47—Fe2              | 70.8 (4) | C37—Fe2—C43 | 159.1 |
| O14—Ti4—O17 | 178.1 (2) | O5—C13—C14   | 112.5 (7)  | C46—C47—C43              | 108.8    | C37—Fe2—C44 | 159.7 |
| O14—Ti4—O18 | 95.0 (2)  | C15—C13—O5   | 114.7 (8)  | O23—C48—C33 <sup>i</sup> | 117.2    | C37—Fe2—C45 | 124.6 |
| O14—Ti4—O20 | 95.8 (2)  | C15—C13—C14  | 112.7 (10) | O24—C48—O23              | 126.7    | C37—Fe2—C46 | 109.3 |
| O15—Ti4—O14 | 96.7 (2)  | O7—C16—C17   | 109.3 (7)  | O24—C48—C33 <sup>i</sup> | 116.1    | C37—Fe2—C47 | 123.3 |
| O15—Ti4—O16 | 104.6 (2) | C18—C16—O7   | 111.8 (7)  | O15—C49—C50              | 108.9    | C38—Fe2—C45 | 160.1 |
| O15—Ti4—O17 | 84.7 (2)  | C18—C16—C17  | 112.6 (8)  | O15—C49—C51              | 108.8    | C38—Fe2—C46 | 123.6 |
| O15—Ti4—O18 | 102.4 (2) | O11—C19—C20  | 108.9 (10) | C50—C49—C51              | 112.6    | C39—Fe2—C38 | 40.4  |
| O15—Ti4—O20 | 167.1 (2) | O11—C19—C21  | 114.7 (10) | O16—C52—C53              | 119.3    | C39—Fe2—C45 | 158.6 |
| O16—Ti4—O17 | 84.2 (2)  | C21—C19—C20  | 120.2 (14) | O16—C52—C54              | 107.9    | C39—Fe2—C46 | 158.6 |
| O16—Ti4—O18 | 148.97    | O6—C25—C26   | 117.1 (5)  | C54—C52—C53              | 110.6    | C40—Fe2—C38 | 67.7  |
| O16—Ti4—O20 | 76.44     | O13—C25—O6   | 124.9 (6)  | O18—C55—C56              | 109.4    | C40—Fe2—C39 | 39.8  |
| O18—Ti4—O17 | 83.45     | O13—C25—C26  | 118.0 (5)  | C57—C55—O18              | 113.8    | C40—Fe2—C41 | 40.7  |
| O20—Ti4—O17 | 82.68     | C25—C26—Fe1  | 123.3 (5)  | C57—C55—C56              | 116.5    | C40—Fe2—C43 | 120.6 |
| O20—Ti4—O18 | 73.83     | C27—C26—Fe1  | 68.9 (4)   | O22—C58—C59              | 110.9    | C40—Fe2—C44 | 106.8 |
| O16—Ti5—O21 | 89.8 (2)  | C27—C26—C25  | 127.3 (6)  | O22—C58—C60              | 111.3    | C40—Fe2—C45 | 124.0 |
| O16—Ti5—O24 | 162.24    | C27—C26—C30  | 107.1 (6)  | O19—C61—C62              | 108.5    | C40—Fe2—C46 | 160.9 |
| O19—Ti5—Ti4 | 138.24    | C30—C26—Fe1  | 68.5 (4)   | C63—C61—O19              | 112.6    | C41—Fe2—C38 | 69.0  |
| O19—Ti5—O16 | 103.6 (2) | C30—C26—C25  | 125.3 (6)  | C63—C61—C62              | 113.9    | C41—Fe2—C39 | 68.3  |
| O19—Ti5—O20 | 166.2 (3) | C26—C27—Fe1  | 70.2 (4)   | C65—C64—O26              | 101 (3)  | C41—Fe2—C43 | 156.7 |
| O19—Ti5—O21 | 84.0 (2)  | C28—C27—Fe1  | 70.2 (4)   | C65—C64—C66              | 114 (3)  | C41—Fe2—C44 | 121.9 |
| O19—Ti5—O24 | 92.0 (2)  | C28—C27—C26  | 108.6 (6)  | C66—C64—O26              | 101 (3)  | C41—Fe2—C45 | 108.4 |
| O19—Ti5—O25 | 97.6 (3)  | C27—C28—Fe1  | 69.4 (4)   | O26—C64A—C65A            | 114.8    | C41—Fe2—C46 | 124.7 |
| O20—Ti5—O16 | 77.09     | C27—C28—C29  | 108.7 (6)  | O26—C64A—C66A            | 105.7    | C43—Fe2—C38 | 122.0 |
| O20—Ti5—O21 | 82.15     | C29—C28—Fe1  | 69.8 (4)   | C65A—C64A—C66A           | 119.8    | C43—Fe2—C39 | 105.8 |
| O20—Ti5—O24 | 85.71     | C28—C29—Fe1  | 69.5 (4)   | O14—C67—C69              | 100 (2)  | C43—Fe2—C44 | 40.6  |
| O24—Ti5—O21 | 83.49     | C28—C29—C30  | 108.3 (6)  | C68—C67—O14              | 106 (2)  | C43—Fe2—C45 | 68.4  |
| O25—Ti5—O16 | 94.7 (2)  | C30—C29—Fe1  | 69.2 (4)   | C68—C67—C69              | 121 (3)  | C43—Fe2—C46 | 68.8  |
| O25—Ti5—O20 | 96.1 (2)  | C26—C30—Fe1  | 69.7 (4)   | O14—C67A—C68A            | 116.6    | C44—Fe2—C38 | 157.7 |
| O25—Ti5—O21 | 174.8 (2) | C29—C30—Fe1  | 70.0 (4)   | O14—C67A—C69A            | 109.0    | C44—Fe2—C39 | 121.7 |
| O25—Ti5—O24 | 91.4 (2)  | C29—C30—C26  | 107.2 (6)  | C68A—C67A—C69A           | 111 (2)  | C44—Fe2—C45 | 40.7  |
| O18—Ti6—O23 | 165.68    | C32—C31—Fe1  | 70.4 (4)   | O25—C70—C71              | 101.6    | C44—Fe2—C46 | 68.6  |
| O20—Ti6—O18 | 79.15     | C35—C31—Fe1  | 69.2 (4)   | O25—C70—C72              | 128 (2)  | C45—Fe2—C46 | 40.5  |
| O20—Ti6—O23 | 86.94     | C35—C31—C32  | 107.3 (7)  | C72—C70—C71              | 106 (2)  | C47—Fe2—C38 | 107.8 |
| O22—Ti6—O18 | 96.6 (2)  | C31—C32—Fe1  | 69.4 (4)   | C71A—C70A—O25            | 119 (3)  | C47—Fe2—C39 | 122.8 |
| O22—Ti6—O20 | 124.3 (2) | C31—C32—C33  | 108.3 (7)  | C71A—C70A—C72A           | 106.2    | C47—Fe2—C40 | 158.0 |
| O22—Ti6—O23 | 88.4 (2)  | C33—C32—Fe1  | 69.3 (4)   | C72A—C70A—O25            | 99.1     | C47—Fe2—C41 | 159.9 |
| O26—Ti6—O18 | 99.1 (2)  | C32—C33—Fe1  | 69.8 (4)   | C11—C73—C12              | 114 (2)  | C47—Fe2—C43 | 42.0  |

|                                                                       |           |                           |             |                         |          |              |       |
|-----------------------------------------------------------------------|-----------|---------------------------|-------------|-------------------------|----------|--------------|-------|
| O26—Ti6—O20                                                           | 121.5 (3) | C32—C33—C48 <sup>i</sup>  | 125.4 (6)   | C26—Fe1—C32             | 158.9    | C47—Fe2—C44  | 68.8  |
| O26—Ti6—O22                                                           | 114.1 (3) | C34—C33—Fe1               | 69.0 (4)    | C26—Fe1—C33             | 158.2    | C47—Fe2—C45  | 67.5  |
| O26—Ti6—O23                                                           | 91.0 (2)  | C34—C33—C32               | 107.5 (6)   | C27—Fe1—C26             | 40.9 (2) | C47—Fe2—C46  | 39.5  |
| Ti1—O1—Ti2                                                            | 102.50    | C34—C33—C48 <sup>i</sup>  | 127.0 (7)   | C27—Fe1—C28             | 40.4 (3) |              |       |
| C1—O1—Ti1                                                             | 120.7 (4) | C48 <sup>i</sup> —C33—Fe1 | 123.7 (5)   | C27—Fe1—C29             | 68.6 (3) |              |       |
| C1—O1—Ti2                                                             | 134.1 (4) | C33—C34—Fe1               | 70.1 (4)    | C27—Fe1—C30             | 69.6 (3) |              |       |
| C4—O2—Ti1                                                             | 139.7 (6) | C35—C34—Fe1               | 69.4 (5)    | C27—Fe1—C31             | 159.8    |              |       |
| C7—O3—Ti1                                                             | 139.3 (5) | C35—C34—C33               | 106.8 (8)   | C27—Fe1—C32             | 158.9    |              |       |
| C10—O4—Ti2                                                            | 139.0 (4) | C31—C35—Fe1               | 70.5 (5)    | C27—Fe1—C33             | 122.8    |              |       |
| <b>Some bond angle information of Ti<sub>18</sub>Fedc<sub>6</sub></b> |           |                           |             |                         |          |              |       |
| O2—Ti1—O9                                                             | 97.81     | O21—Ti7—O5                | 99.29 (15)  | C45—O32—Ti6             | 124.5    | C23—C56—Fe1  | 69.2  |
| O2—Ti1—O15                                                            | 97.23     | O21—Ti7—O7                | 176.99 (14) | C33—O33—Ti1             | 144.6    | C23—C56—C64  | 125.2 |
| O2—Ti1—O16                                                            | 93.44     | O21—Ti7—O22               | 97.65 (15)  | C16—O34—Ti2             | 136.2    | C27—C56—Fe1  | 70.1  |
| O2—Ti1—O23                                                            | 176.63    | O21—Ti7—O26               | 98.45 (16)  | C48—N1—Ti4 <sup>i</sup> | 118.9    | C27—C56—C23  | 108.2 |
| O2—Ti1—O33                                                            | 97.38     | O21—Ti7—O31               | 97.53 (15)  | C48—N1—C80              | 117.4    | C27—C56—C64  | 126.5 |
| O9—Ti1—O15                                                            | 77.71     | O22—Ti7—O7                | 79.51 (12)  | C80—N1—Ti4 <sup>i</sup> | 123.7    | C64—C56—Fe1  | 126.0 |
| O9—Ti1—O16                                                            | 86.49     | O22—Ti7—O26               | 69.33 (13)  | O7—N2—Ti9               | 115.4    | C5—C57—C31   | 118.6 |
| O9—Ti1—O23                                                            | 81.67     | O26—Ti7—O7                | 81.56 (12)  | C72—N2—Ti9              | 134.1    | C59—C57—C5   | 119.2 |
| O15—Ti1—O16                                                           | 161.97    | O31—Ti7—O7                | 81.24 (12)  | C72—N2—O7               | 110.4    | C59—C57—C31  | 122.1 |
| O15—Ti1—O23                                                           | 85.93     | O31—Ti7—O22               | 84.71 (13)  | O22—N3—Ti8              | 117.0    | O14—C59—C57  | 121.9 |
| O16—Ti1—O23                                                           | 83.21     | O31—Ti7—O26               | 151.03 (14) | C31—N3—Ti8              | 132.6    | O14—C59—C63  | 118.6 |
| O33—Ti1—O9                                                            | 164.80    | O14—Ti8—O31               | 149.67 (15) | C31—N3—O22              | 109.0    | C57—C59—C63  | 119.4 |
| O33—Ti1—O15                                                           | 100.84    | O14—Ti8—N3                | 79.05 (16)  | C21—C1—C32              | 120.2    | O12—C61—C14  | 110.3 |
| O33—Ti1—O16                                                           | 92.12     | O25—Ti8—O14               | 96.41 (16)  | C40—C1—C21              | 117.8    | O12—C61—C44  | 109.3 |
| O33—Ti1—O23                                                           | 83.14     | O25—Ti8—O31               | 82.88 (14)  | C40—C1—C32              | 122.0    | C14—C61—C44  | 112.0 |
| O8—Ti2—O9                                                             | 125.80    | O25—Ti8—N3                | 136.04 (16) | O4—C2—C36               | 106.7    | C42—C63—C59  | 120.4 |
| O8—Ti2—O12                                                            | 113.0 (2) | O30—Ti8—O14               | 103.81 (18) | O4—C2—C74               | 110.4    | O3—C64—O24   | 124.8 |
| O8—Ti2—O13                                                            | 98.77     | O30—Ti8—O25               | 110.80 (19) | C36—C2—C74              | 116.8    | O3—C64—C56   | 118.2 |
| O8—Ti2—O34                                                            | 89.09     | O30—Ti8—O31               | 104.73 (17) | C6—C5—C57               | 119.8    | O24—C64—C56  | 117.0 |
| O9—Ti2—O13                                                            | 78.22     | O30—Ti8—N3                | 112.73 (19) | C42—C6—C5               | 120.4    | C46—C65—C49  | 119.4 |
| O9—Ti2—O34                                                            | 86.09     | O31—Ti8—N3                | 80.68 (14)  | O26—C12—C58             | 109.2    | O18—C67—C20  | 110.5 |
| O12—Ti2—O9                                                            | 120.95    | O4—Ti9—O6                 | 97.03 (18)  | O26—C12—C66             | 111.0    | O18—C67—C78  | 110.6 |
| O12—Ti2—O13                                                           | 98.84     | O4—Ti9—O10                | 99.63 (18)  | C66—C12—C58             | 113.2    | C78—C67—C20  | 109.2 |
| O12—Ti2—O34                                                           | 90.50     | O4—Ti9—O22                | 102.68 (17) | O17—C13—C8              | 115.3    | O27—C71—C18  | 109.8 |
| O13—Ti2—O34                                                           | 164.24    | O4—Ti9—O26                | 95.09 (17)  | O17—C13—C11             | 113.0    | C73—C71—O27  | 113.0 |
| O9—Ti3—O15                                                            | 75.80     | O4—Ti9—N2                 | 168.90 (18) | C29—C24—C16             | 125.2    | C73—C71—C18  | 115.9 |
| O9—Ti3—O19                                                            | 82.41     | O6—Ti9—O10                | 95.29 (16)  | C24—C25—Fe1             | 68.7 (2) | O11—C72—C39  | 120.5 |
| O13—Ti3—O9                                                            | 74.46     | O6—Ti9—O22                | 158.83 (15) | C41—C25—Fe1             | 70.6 (3) | N2—C72—O11   | 118.9 |
| O13—Ti3—O15                                                           | 148.17    | O6—Ti9—O26                | 115.75 (16) | C41—C25—C24             | 107.4    | N2—C72—C39   | 120.5 |
| O13—Ti3—O19                                                           | 83.67     | O6—Ti9—N2                 | 78.60 (14)  | C37—C27—Fe1             | 69.9 (3) | O15—C75—C50  | 110.1 |
| O15—Ti3—O19                                                           | 81.43     | O10—Ti9—O22               | 74.01 (14)  | C37—C27—C56             | 107.9    | C9—C75—O15   | 110.8 |
| O28—Ti3—O9                                                            | 96.83     | O10—Ti9—O26               | 143.62 (14) | C56—C27—Fe1             | 69.3 (2) | C9—C75—C50   | 117.1 |
| O28—Ti3—O13                                                           | 97.92     | O10—Ti9—N2                | 90.97 (14)  | C24—C29—Fe1             | 69.4 (2) | C46—C77—C43  | 119.4 |
| O28—Ti3—O15                                                           | 96.60     | O22—Ti9—O26               | 70.36 (13)  | C35—C29—Fe1             | 71.5 (3) | N1—C80—C40   | 122.7 |
| O28—Ti3—O19                                                           | 178.01    | O22—Ti9—N2                | 83.30 (13)  | C35—C29—C24             | 109.1    | O8—C82—C81   | 117.8 |
| O28—Ti3—O29                                                           | 97.47     | O26—Ti9—N2                | 77.97 (13)  | O30—C30—C76             | 108.1    | O8—C82—C83   | 114.0 |
| O29—Ti3—O9                                                            | 165.25    | Ti5—O1—Ti4                | 138.22 (15) | C68—C30—O30             | 113.2    | C83—C82—C81  | 127.8 |
| O29—Ti3—O13                                                           | 99.99     | Ti6—O1—Ti4                | 106.77 (13) | C68—C30—C76             | 113.8    | O8—C82A—C81A | 100   |
| O29—Ti3—O15                                                           | 106.00    | Ti6—O1—Ti5                | 106.91 (13) | O10—C31—N3              | 117.4    | O8—C82A—C83A | 111.9 |

|                         |        |             |             |             |          |             |        |
|-------------------------|--------|-------------|-------------|-------------|----------|-------------|--------|
| O29—Ti3—O19             | 83.40  | C51—O2—Ti1  | 138.6 (3)   | O10—C31—C57 | 123.4    | C23—Fe1—C25 | 151.96 |
| O1—Ti4—O24              | 87.15  | C64—O3—Ti5  | 138.3 (3)   | N3—C31—C57  | 119.1    | C23—Fe1—C27 | 68.73  |
| O1—Ti4—O32              | 73.86  | C2—O4—Ti9   | 153.4 (5)   | O19—C32—C1  | 116.0    | C23—Fe1—C35 | 126.3  |
| O1—Ti4—N1 <sup>i</sup>  | 83.13  | Ti4—O5—Ti7  | 137.26 (17) | O23—C32—O19 | 127.2    | C23—Fe1—C37 | 68.49  |
| O5—Ti4—O1               | 94.23  | C49—O6—Ti9  | 142.2 (3)   | O23—C32—C1  | 116.8    | C23—Fe1—C41 | 164.6  |
| O5—Ti4—O17              | 99.95  | Ti6—O7—Ti7  | 128.74 (14) | O33—C33—C3  | 108.9    | C23—Fe1—C47 | 40.64  |
| O5—Ti4—O24              | 91.61  | N2—O7—Ti6   | 117.6 (2)   | O33—C33—C69 | 110.0    | C23—Fe1—C56 | 41.01  |
| O5—Ti4—O32              | 99.27  | N2—O7—Ti7   | 112.8 (2)   | C69—C33—C3  | 111.9    | C24—Fe1—C23 | 116.60 |
| O5—Ti4—N1 <sup>i</sup>  | 170.99 | C82—O8—Ti2  | 149.1 (7)   | C29—C35—Fe1 | 68.4 (3) | C24—Fe1—C25 | 40.92  |
| O17—Ti4—O1              | 165.53 | C82A—O8—Ti2 | 160.2 (10)  | C29—C35—C41 | 107.5    | C24—Fe1—C27 | 162.49 |
| O17—Ti4—O24             | 95.28  | Ti1—O9—Ti3  | 104.17 (13) | C41—C35—Fe1 | 70.2 (3) | C24—Fe1—C29 | 41.18  |
| O17—Ti4—O32             | 100.79 | Ti2—O9—Ti1  | 141.56 (16) | C27—C37—Fe1 | 69.7 (3) | C24—Fe1—C35 | 68.52  |
| O17—Ti4—N1 <sup>i</sup> | 83.27  | Ti2—O9—Ti3  | 105.08 (14) | C27—C37—C47 | 108.1    | C24—Fe1—C37 | 123.87 |
| O24—Ti4—N1 <sup>i</sup> | 79.68  | C31—O10—Ti9 | 119.4 (3)   | C47—C37—Fe1 | 69.2 (3) | C24—Fe1—C41 | 68.09  |
| O32—Ti4—O24             | 158.67 | C72—O11—Ti6 | 118.2 (3)   | O28—C38—C10 | 114.1    | C24—Fe1—C47 | 104.07 |
| O1—Ti5—O3               | 87.60  | C61—O12—Ti2 | 146.2 (3)   | O28—C38—C62 | 117.5    | C24—Fe1—C56 | 153.16 |
| O1—Ti5—O27              | 74.70  | Ti2—O13—Ti3 | 100.90 (14) | C62—C38—C10 | 125.1    | C25—Fe1—C27 | 127.31 |
| O1—Ti5—O31              | 85.82  | C22—O13—Ti2 | 130.7 (4)   | C43—C39—C49 | 119.1    | C25—Fe1—C35 | 67.9   |
| O3—Ti5—O31              | 82.75  | C22—O13—Ti3 | 128.2 (3)   | C43—C39—C72 | 120.1    | C25—Fe1—C37 | 107.6  |
| O20—Ti5—O1              | 99.00  | C59—O14—Ti8 | 142.1 (3)   | C49—C39—C72 | 120.6    | C25—Fe1—C41 | 40.32  |
| O20—Ti5—O3              | 88.35  | Ti1—O15—Ti3 | 101.96 (13) | C80—C40—C1  | 119.8    | C27—Fe1—C35 | 123.21 |
| O20—Ti5—O25             | 100.59 | C75—O15—Ti1 | 125.1 (4)   | C25—C41—Fe1 | 69.1 (3) | C27—Fe1—C37 | 40.39  |
| O20—Ti5—O27             | 98.33  | C75—O15—Ti3 | 132.5 (3)   | C35—C41—Fe1 | 70.0 (3) | C27—Fe1—C41 | 111.52 |
| O20—Ti5—O31             | 169.71 | C16—O16—Ti1 | 137.1 (3)   | C35—C41—C25 | 109.0    | C29—Fe1—C23 | 106.02 |
| O25—Ti5—O1              | 157.93 | C13—O17—Ti4 | 157.1 (4)   | C63—C42—C6  | 120.7    | C29—Fe1—C25 | 68.4   |
| O25—Ti5—O3              | 102.97 | C67—O18—Ti6 | 148.0 (3)   | C39—C43—C77 | 121.3    | C29—Fe1—C27 | 156.06 |
| O25—Ti5—O27             | 92.45  | C32—O19—Ti3 | 129.0 (3)   | O32—C45—C19 | 109.4    | C29—Fe1—C35 | 40.08  |
| O25—Ti5—O31             | 76.54  | C55—O20—Ti5 | 145.9 (3)   | O32—C45—C53 | 109.4    | C29—Fe1—C37 | 161.34 |
| O27—Ti5—O3              | 161.82 | C54—O21—Ti7 | 142.4 (4)   | C19—C45—C53 | 113.2    | C29—Fe1—C41 | 67.2   |
| O27—Ti5—O31             | 91.69  | Ti9—O22—Ti7 | 106.50 (15) | C77—C46—C65 | 121.6    | C29—Fe1—C47 | 123.64 |
| O1—Ti6—O7               | 88.51  | N3—O22—Ti7  | 119.9 (2)   | C23—C47—Fe1 | 69.3 (3) | C29—Fe1—C56 | 120.24 |
| O1—Ti6—O11              | 160.22 | N3—O22—Ti9  | 119.1 (3)   | C23—C47—C37 | 108.0    | C35—Fe1—C41 | 39.7   |
| O1—Ti6—O27              | 77.27  | C32—O23—Ti1 | 127.4 (3)   | C37—C47—Fe1 | 70.0 (3) | C37—Fe1—C35 | 157.0  |
| O1—Ti6—O32              | 74.55  | C64—O24—Ti4 | 137.5 (3)   | N1—C48—C21  | 123.0    | C37—Fe1—C41 | 122.4  |
| O7—Ti6—O32              | 90.47  | Ti8—O25—Ti5 | 106.86 (17) | O6—C49—C39  | 122.4    | C47—Fe1—C25 | 118.1  |
| O11—Ti6—O7              | 74.52  | Ti9—O26—Ti7 | 104.75 (15) | O6—C49—C65  | 118.5    | C47—Fe1—C27 | 68.45  |
| O11—Ti6—O27             | 110.81 | C12—O26—Ti7 | 123.2 (3)   | C39—C49—C65 | 119.1    | C47—Fe1—C35 | 161.8  |
| O11—Ti6—O32             | 95.10  | C12—O26—Ti9 | 130.5 (4)   | O2—C51—C28  | 109.7    | C47—Fe1—C37 | 40.8   |
| O18—Ti6—O1              | 109.96 | Ti6—O27—Ti5 | 100.58 (12) | O2—C51—C79  | 109.2    | C47—Fe1—C41 | 154.7  |
| O18—Ti6—O7              | 161.51 | C71—O27—Ti5 | 126.3 (3)   | C79—C51—C28 | 112.7    | C56—Fe1—C25 | 165.44 |
| O18—Ti6—O11             | 87.42  | C71—O27—Ti6 | 133.2 (3)   | O29—C52—C4  | 107.7    | C56—Fe1—C27 | 40.57  |
| O18—Ti6—O27             | 97.23  | C38—O28—Ti3 | 151.1 (5)   | O29—C52—C34 | 111.7    | C56—Fe1—C35 | 110.22 |
| O18—Ti6—O32             | 95.14  | C52—O29—Ti3 | 149.2 (4)   | C4—C52—C34  | 112.8    | C56—Fe1—C37 | 68.10  |
| O27—Ti6—O7              | 85.78  | C30—O30—Ti8 | 148.8 (6)   | O21—C54—C17 | 107.6    | C56—Fe1—C41 | 129.17 |
| O27—Ti6—O32             | 151.65 | Ti7—O31—Ti5 | 134.10 (15) | O21—C54—C60 | 109.6    | C56—Fe1—C47 | 68.44  |
| O5—Ti7—O7               | 83.69  | Ti7—O31—Ti8 | 129.23 (16) | C60—C54—C17 | 115.1    |             |        |
| O5—Ti7—O22              | 159.52 | Ti8—O31—Ti5 | 92.79 (13)  | O20—C55—C7  | 108.9    |             |        |
| O5—Ti7—O26              | 96.76  | Ti4—O32—Ti6 | 100.55 (12) | O20—C55—C26 | 109.6    |             |        |
| O5—Ti7—O31              | 104.30 | C45—O32—Ti4 | 133.6 (3)   | C26—C55—C7  | 114.2    |             |        |



### 3. The synthesis of clusters

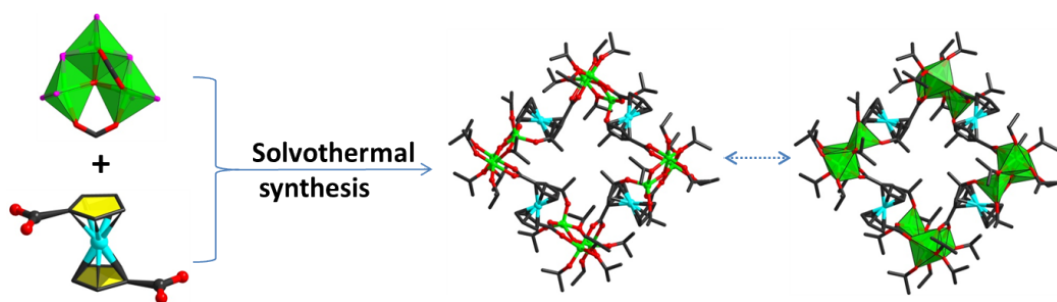

Figure S1. The assembly of the cluster  $\text{Ti}_{12}\text{Fcdc}_4$ .

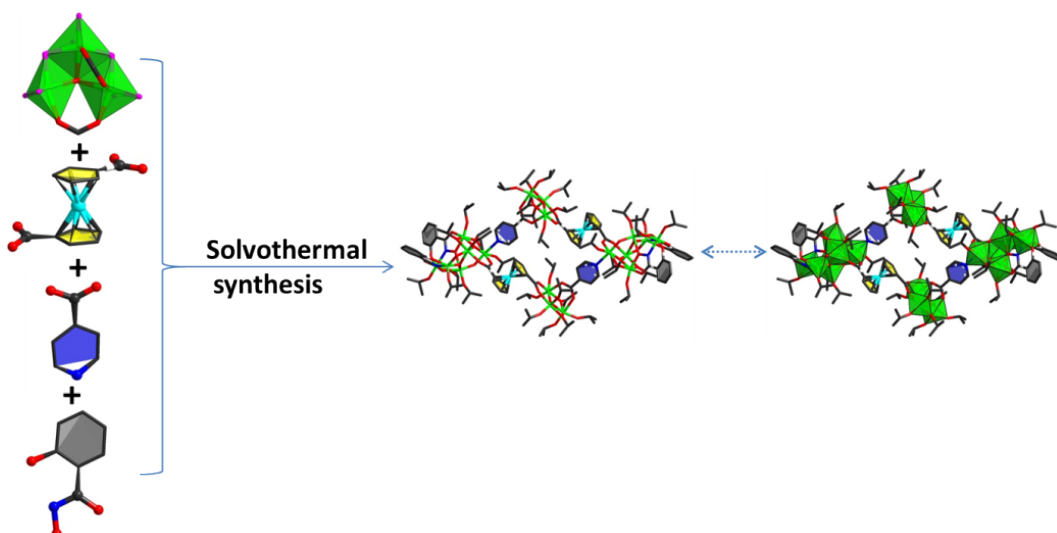

Figure S2. The assembly of the cluster  $\text{Ti}_{18}\text{Fcdc}_2$ .

#### 4. The structure of clusters

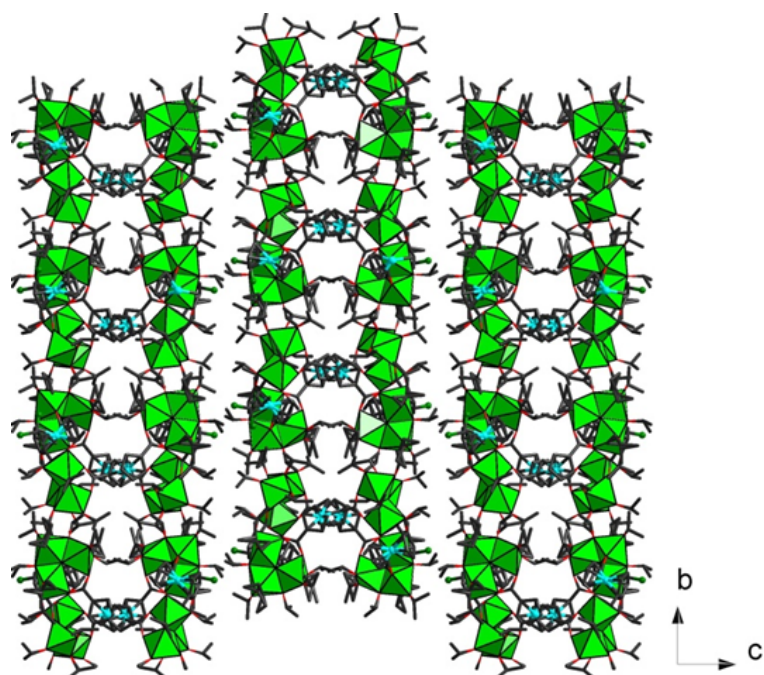

**Figure S3.** Packing structure of cluster  $\text{Ti}_{12}\text{Fcdc}_4$  along  $a$ -axis.

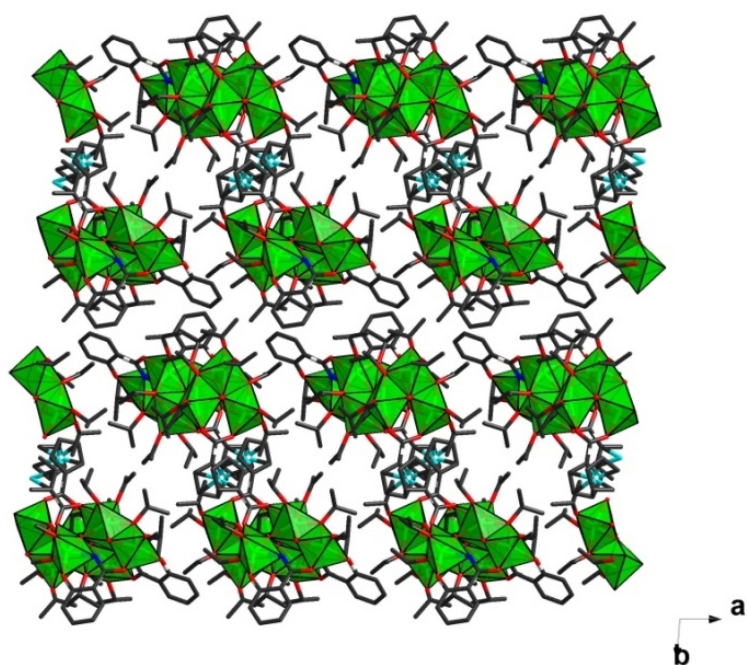

**Figure S4.** Packing structure of cluster  $\text{Ti}_{18}\text{Fcdc}_2$  along  $c$ -axis.

## 5. Powder X-ray diffraction (PXRD)

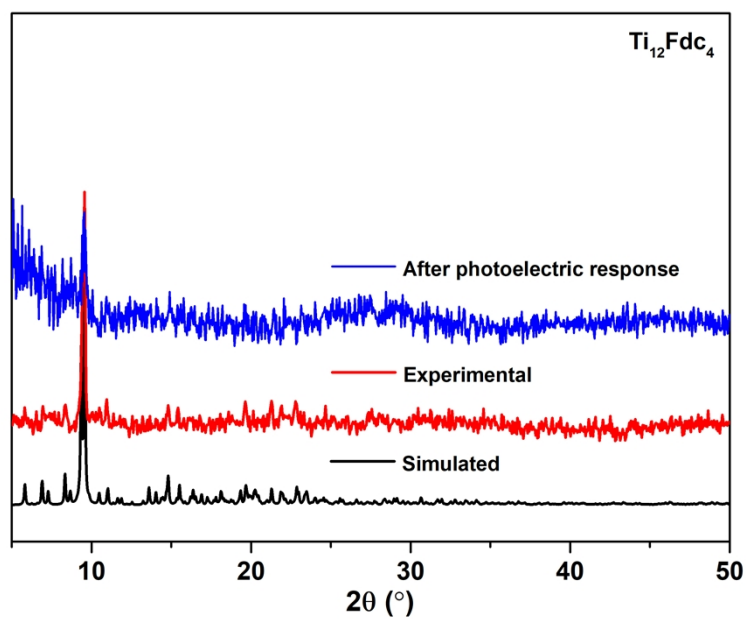

**Figure S5.** The XRD patterns of cluster  $\text{Ti}_{12}\text{Fcd}_4$ .

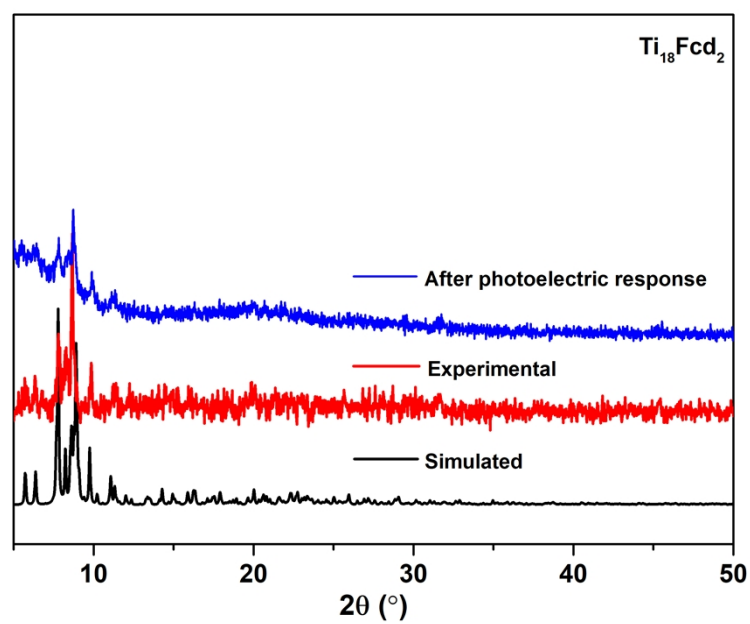

**Figure S6.** The XRD patterns of cluster  $\text{Ti}_{18}\text{Fcd}_2$ .

## 6. Thermogravimetric analysis (TGA)

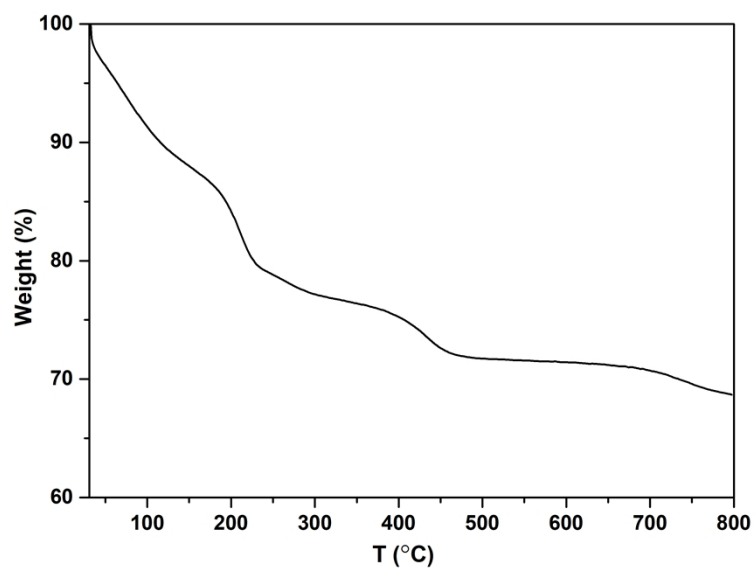

**Figure S7.** Thermal decomposition curve of cluster  $\text{Ti}_{12}\text{Fcdc}_4$ .

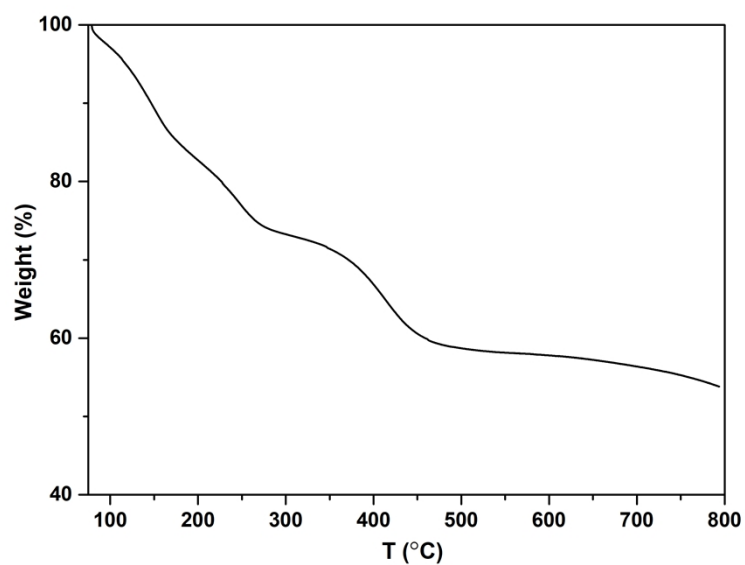

**Figure S8.** Thermal decomposition curve of cluster  $\text{Ti}_{18}\text{Fcdc}_2$ .

## 7. Infrared spectroscopy (IR)

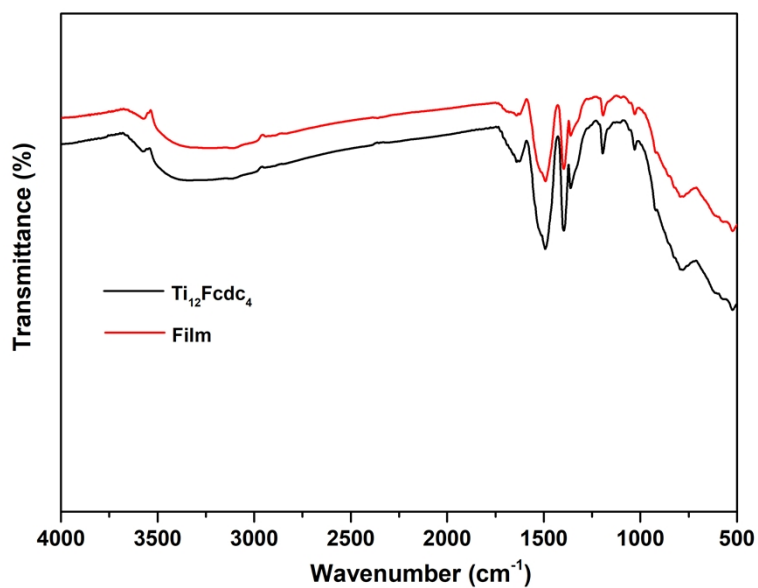

Figure S9. IR spectra of cluster  $\text{Ti}_{12}\text{Fcdc}_4$ .

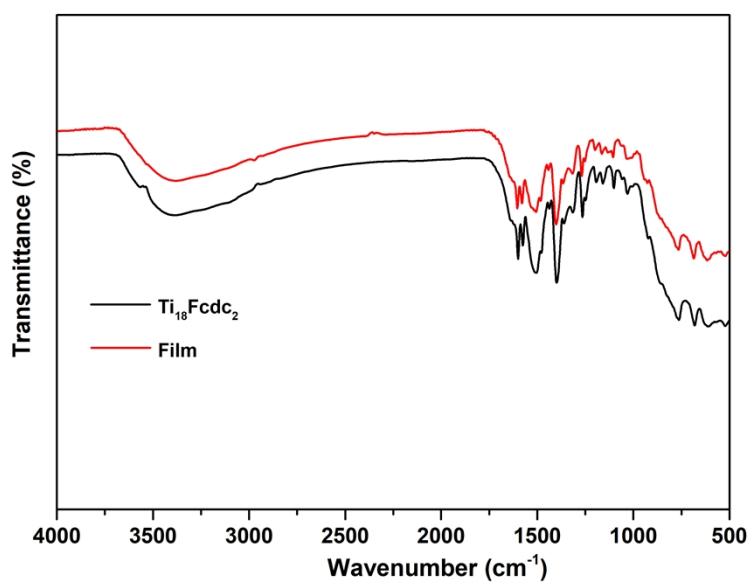

Figure S10. IR spectra of cluster  $\text{Ti}_{18}\text{Fcdc}_2$ .

## 8. X-ray photoelectron spectroscopy (XPS)

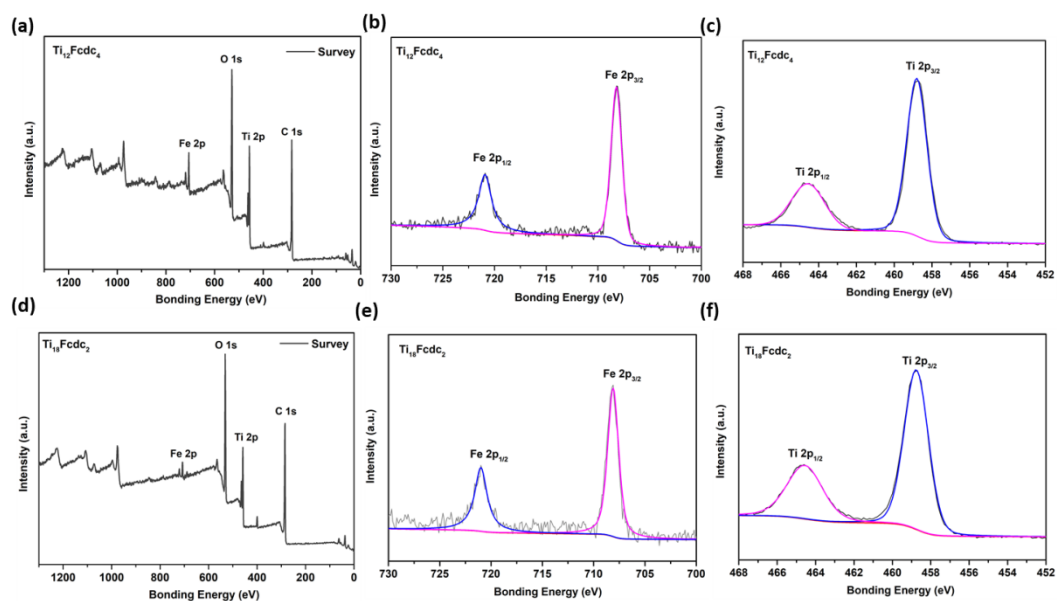

**Figure S11.** The full-scan and high-resolution XPS spectra of  $\text{Ti}_{12}\text{Fcdc}_4$  (a, b, c) and  $\text{Ti}_{18}\text{Fcdc}_2$  (d, e, f) crystals.

## 9. Electrochemical impedance spectroscopy (EIS)

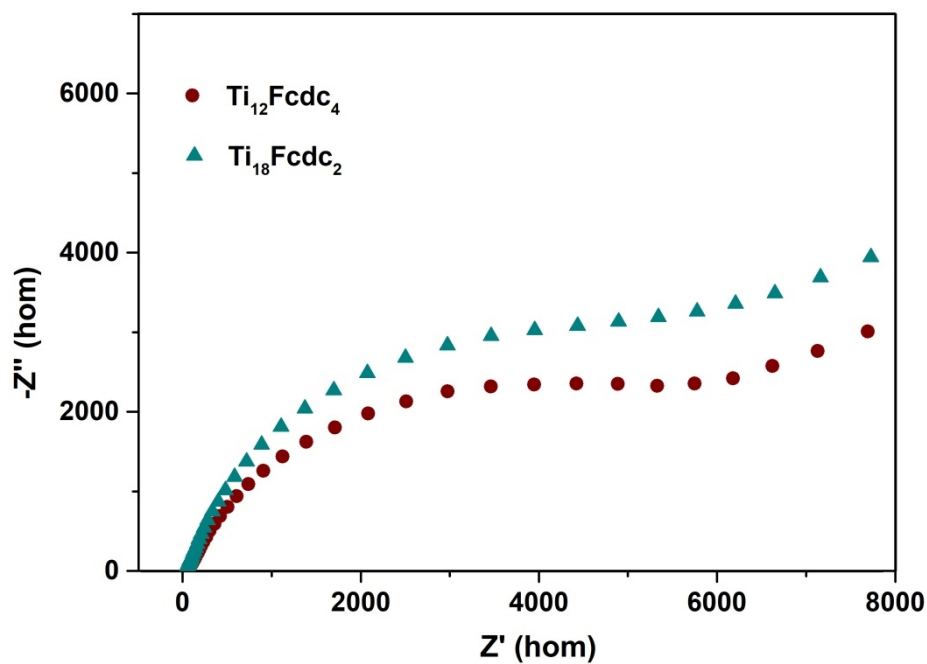

**Figure S12.** The Nyquist plots of clusters  $\text{Ti}_{12}\text{Fcdc}_4$  and  $\text{Ti}_{18}\text{Fcdc}_2$ .

## References

1. Dolomanov, O. V.; Bourhis, L. J.; Gildea, R. J.; Howard, J. A. K.; Puschmann, H. OLEX2: A Complete Structure Solution, Refinement and Analysis Program. *J. Appl. Crystallogr.* **2009**, 42, 339-341.
2. Sheldrick, G. M. Crystal Structure Refinement with SHELXL. *Acta Cryst.* **2015**, C71, 3-8.
3. M. J. Frisch, G. W. Trucks, H. B. Schlegel, G. E. Scuseria, M. A. Robb, J. R. Cheeseman, G. Scalmani, V. Barone, B. Mennucci, G. A. Petersson, H. Nakatsuji, M. Caricato, X. Li, H. P. Hratchian, A. F. Izmaylov, J. Bloino, G. Zheng, J. L. Sonnenberg, M. Hada, M. Ehara, K. Toyota, R. Fukuda, J. Hasegawa, M. Ishida, T. Nakajima, Y. Honda, O. Kitao, H. Nakai, T. Vreven, J. A. Jr. Montgomery, J. E. Peralta, F. Ogliaro, M. Bearpark, J. J. Heyd, E. Brothers, K. N. Kudin, V. N. Staroverov, T. Keith, R. Kobayashi, J. Normand, K. Raghavachari, A. Rendell, J. C. Burant, S. S. Iyengar, J. Tomasi, M. Cossi, N. Rega, J. M. Millam, M. J. Klene, E. Knox, J. B. Cross, V. Bakken, C. Adamo, J. Jaramillo, R. Gomperts, R. E. Stratmann, O. Yazyev, A. J. Austin, R. Cammi, C. Pomelli, J. W. Ochterski, R. L. Martin, K. Morokuma, V. G. Zakrzewski, G. A. Voth, P. Salvador, J. J. Dannenberg, S. Dapprich, A. D. Daniels, O. Farkas, J. B. Foresman, J. V. Ortiz, J. Cioslowski, D. J. Fox, *Gaussian 09, revision B.01*; Gaussian, Inc.: Wallingford, CT, 2010.
